# Supplementary material for: Elimination of Chromosomal Island SpyCIM1 from Streptococcus pyogenes Strain SF370 Reverses the Mutator Phenotype and Alters Global Transcription
Source: PubMed Central journal article supplement (PMC4689407; doi:10.1371/journal.pone.0145884), 2015-12-23
Supplement: pone.0145884.s005.pdf [file pone.0145884.s005.pdf]

**S1 Table.**

| <b>SpyCIM1 ORF</b> | <b>Protein ID</b> | <b>Predicted product</b> | <b>Gene</b> | <b>Coordinates</b> | <b>Comment</b>                                                                                  |
|--------------------|-------------------|--------------------------|-------------|--------------------|-------------------------------------------------------------------------------------------------|
| 1                  | SPy2122           | Integrase                | <i>int</i>  | 1774028-1775170    |                                                                                                 |
| 2                  |                   |                          |             | 1775236-1775394    | Not in Genbank annotation                                                                       |
| 3                  |                   |                          |             | 1775425-1775565    | Transmembrane domain peptide; not in Genbank annotation                                         |
| 4                  |                   |                          |             | 1775783-1775941    | Not in Genbank annotation                                                                       |
| 5                  | SPy2125           | Repressor for immunity   | <i>cl</i>   | 1776432-1777196    | HTH motif                                                                                       |
| 6                  | SPy2126           | Anti-repressor           | <i>cro</i>  | 1777350-1777553    | HTH motif                                                                                       |
| 7                  | SPy2127           |                          |             | 1777590-1778354    | HTH motif; BRO family, N-terminal domain protein                                                |
| 8                  | SPy2128           |                          |             | 1778367-1778987    | BRO family, N-terminal domain protein                                                           |
| 9                  | SPy2129           |                          |             | 1778990-1779256    |                                                                                                 |
| 10                 | SPy2130           |                          |             | 1779515-1779853    | Homologous to <i>Lactobacillus plantarum</i> WCFS1 prophage Lp4 protein 11, DNA replication     |
| 11                 | Spy2131           |                          |             | 1779843-1780061    |                                                                                                 |
| 12                 | Spy2132           |                          |             | 1780067-1780255    |                                                                                                 |
| 13                 | Spy2133           |                          |             | 1780270-1780596    |                                                                                                 |
| 14                 | Spy2134           |                          |             | 1780602-1780871    | HTH motif                                                                                       |
| 15                 | SPy2135           | Replicase                | <i>rep</i>  | 1780875-1781729    | Contains homologous replication module to <i>Streptococcus thermophilus</i> plasmid pSt106 [53] |
| 16                 | SPy2136           | Primase                  | <i>pri</i>  | 1781701-1783386    |                                                                                                 |
| 17                 |                   |                          |             | 1783676-1783846    | Not in Genbank annotation                                                                       |
| 18                 |                   |                          |             | 1783855-1784025    | Not in Genbank annotation                                                                       |
| 19                 | SPy2140           |                          |             | 1784030-1784536    |                                                                                                 |
| 20                 | SPy2142           |                          |             | 1784613-1785098    |                                                                                                 |
| 21                 |                   |                          |             | 1785325-1785474    | Not in Genbank annotation                                                                       |
| 22                 | Spy2144           |                          |             | 1785505-1785864    |                                                                                                 |
| 23                 | Spy2145           |                          |             | 1785842-1786222    | HTH motif                                                                                       |
| 24                 | SPy2147           |                          |             | 1786426-1786971    | Contains a Gram-positive signal peptide                                                         |
