# Supplementary material for: Elimination of Chromosomal Island SpyCIM1 from Streptococcus pyogenes Strain SF370 Reverses the Mutator Phenotype and Alters Global Transcription
Source: PubMed Central journal article supplement (PMC4689407; doi:10.1371/journal.pone.0145884), 2015-12-23
Supplement: pone.0145884.s006.pdf [file pone.0145884.s006.pdf]

**S2 Table.**

| Gene Identifier <sup>1</sup> | Gene <sup>2</sup> | 37°C                     |                 | 39°C        |             | Polystyronic<br>mRNA                                             |
|------------------------------|-------------------|--------------------------|-----------------|-------------|-------------|------------------------------------------------------------------|
|                              |                   | Ratio<br>EL <sup>3</sup> | Ratio<br>LL     | Ratio<br>EL | Ratio<br>LL |                                                                  |
| 900379                       | Spy0019           |                          | -4.3            |             |             | Putative secreted protein/amidase                                |
| 900384                       | Spy0024           |                          | -9.0            | -4.3        |             | Phosphoribosylaminoimidazole<br>succinocarboxamide synthase PurC |
| 900385                       | Spy0025           |                          | -8.5            | -3.1        |             | Phosphoribosylformyl-glycinamide<br>synthase II                  |
| 900386                       | Spy0026           |                          | -8.0            | -3.4        |             | Amidophosphoribosyltransferase<br>PurF                           |
| 900387                       | Spy0027           |                          | -7.4            | -4.0        |             | phosphoribosylformylglycinamide<br>cyclo-ligase                  |
| 900388                       | Spy0028           |                          | -6.1            | -4.7        |             | Phosphoribosylglycinamide<br>formyltransferase                   |
| 900389                       | Spy0031           |                          | -8.5            | -9.6        |             | Choline binding protein                                          |
| 900390                       | Spy0032           |                          | -8.5            | -6.0        |             | Phosphoribosylamine-glycine ligase<br>PurD                       |
| 900391                       | Spy0033           |                          | -6.2            | -3.4        |             | Phosphoribosylaminoimidazole<br>carboxylase PurE                 |
| 900392                       | Spy0034           |                          | -6.2            | -3.4        |             | Phosphoribosylaminoimidazole<br>carboxylase PurK                 |
| 900393                       | Spy0035           |                          | -4.4            |             |             | Abortive infection protein AbiR                                  |
| 900394                       | Spy0036           |                          | -4.1            |             |             | Adenylosuccinate lyase PurB                                      |
| 900395                       | Spy0037           |                          |                 | -4.1        |             | Transcription regulator ComR (Rgg4)                              |
| 900400                       | Spy0044           | -11.9                    |                 |             |             | Alcohol dehydrogenase AdhA                                       |
| 900402                       | Spy0047           |                          |                 | -3.3        |             | 30S ribosomal protein S10                                        |
| 900412                       | Spy0060           |                          |                 | -3.3        |             | 30S ribosomal protein S17                                        |
| 900416                       | Spy0064           |                          |                 | -3.7        |             | 30S ribosomal protein S14                                        |
| 901998                       | Spy0080           |                          |                 | -4.3        |             | 50S ribosomal protein L17                                        |
| 900436                       | Spy0096           | -3.5                     |                 |             |             | Tyrosyl-tRNA synthetase TyrS                                     |
| 900439                       | Spy0099           |                          |                 | -3.0        |             | DNA-directed RNA polymerase<br>subunit beta                      |
| 900441                       | Spy0101           | -5.9                     |                 |             |             | Putative ABC transporter subunit<br>ComYA                        |
| 900445                       | Spy0105           |                          |                 | -4.1        |             | Hypothetical protein                                             |
| 900446                       | Spy0106           |                          |                 | -4.1        |             | Competence protein ComYD                                         |
| 900447                       | Spy0107           |                          |                 | -4.1        |             | Competence protein ComG                                          |
| 900464                       | Spy0133           |                          |                 | -6.3        |             | IS66 ORF2 like protein                                           |
| 900465                       | Spy0135           |                          |                 | -5.1        |             | Sortase                                                          |
| 900467                       | Spy0137           |                          |                 | -6.9        | -6.6        | Short-chain fatty acids transporter<br>AtoE                      |
| 900468                       | Spy0139           | -6.5                     |                 | -6.6        |             | LysR type transcriptional regulator                              |
| 900470                       | Spy0141           | 3.0                      | ND <sup>4</sup> | -10.0       |             | Acetate CoA-transferase<br>subunit subunit alpha                 |

|        |         |                 |      |       |                                                               |
|--------|---------|-----------------|------|-------|---------------------------------------------------------------|
| 900471 | Spy0142 | ND <sup>4</sup> | 14.7 | -19.1 | Acetate CoA-transferase subunit beta                          |
| 900473 | SPy0145 | -3.1            |      |       | Hypothetical protein Yjgf                                     |
| 900474 | Spy0145 | -1.3*           |      |       | PfoR-like transmembrane protein                               |
| 900477 | Spy0149 |                 |      | 4.0   | V-type ATP synthase subunit K NtpK                            |
| 900478 | Spy0150 |                 |      | -4.3  | V-type ATP synthase subunit K NtpE                            |
| 900479 | Spy0151 |                 | -5.3 |       | V-type Na <sup>+</sup> ATP synthase subunit C                 |
| 900481 | Spy0155 |                 | -3.8 |       | V-type ATP synthase subunit B                                 |
| 900484 | Spy0159 | -3.4            |      |       | Hypothetical protein                                          |
| 900488 | Spy0165 | 2.6*            |      | 2.3*  | NAD glycohydrolase (NADase) Nga                               |
| 900489 | Spy0166 | 2.6*            |      | 3.1   | NAD glycohydrolase inhibitor                                  |
| 900490 | Spy0167 | 3.0             |      | 3.6   | Streptolysin O (Slo)                                          |
| 900491 | Spy0168 | -4.6            |      | -5.0  | Hypothetical protein                                          |
| 900492 | Spy0169 |                 |      | -7.2  | Conserved transmembrane protein                               |
| 900493 | Spy0170 |                 |      | -2.9  | Conserved transmembrane protein                               |
| 900494 | Spy0171 | 4.6             |      | -4.6  | Hypothetical protein                                          |
| 900495 | Spy0172 | -4.7            |      |       | Cystathione gamma synthase (CGS) MetB                         |
| 900497 | Spy0174 | -3.2            |      |       | PTS system ascorbate-specific transporter subunit IIC         |
| 900499 | Spy0176 |                 |      | -7.3  | PTS system 3-keto-L-gulonate specific transporter subunit IIA |
| 900505 | Spy0182 | -4.2            |      |       | L-ascorbate 6-phosphate lactonase                             |
| 900507 | Spy0184 |                 |      | -3.6  | Glycine-betaine binding permease                              |
| 900518 | Spy0197 |                 |      | -12.3 | Nicotinate-nucleotide pyrophosphorylase                       |
| 900523 | Spy0205 |                 |      | -7.0  | Zinc finger protein                                           |
| 900529 | Spy0216 |                 |      | -3.6  | Regulatory protein                                            |
| 900535 | Spy0227 | -4.0            |      | -3.7  | MarR family transcriptional regulator                         |
| 900536 | Spy0228 | -2.8            |      | -1.8  | MarR family transcriptional regulator                         |
| 900538 | Spy0230 |                 | -3.2 |       | ABC transporter ATP-binding protein                           |
| 900543 | Spy0238 | -6.0            |      | -3.9  | Hypothetical protein                                          |
| 900551 | Spy0250 |                 |      | -4.4  | 50S ribosomal protein L34                                     |
| 900553 | Spy0252 |                 |      | -3.7  | N-acetylneuraminate-binding protein                           |
| 900554 | Spy0254 |                 |      | -5.1  | N-acetylneuraminate ABC transporter permease                  |
| 900555 | Spy0255 |                 | -4.1 | -7.9  | N-acetylneuraminate ABC transporter permease                  |
| 900556 | Spy0256 |                 |      | -4.0  | Hypothetical protein                                          |
| 900580 | Spy0285 | -3.1            |      |       | ABC transporter ATP-binding protein                           |
| 900604 | Spy0317 | -3.4            |      |       | ABC transporter substrate-binding protein                     |
| 900605 | Spy0319 |                 |      | -3.6  | ABC transporter substrate-binding protein                     |
| 900613 | Spy0330 | -4.9            |      |       | Cytoplasmic membrane protein LemA                             |

|        |         |       |       |       |                                                    |                          |
|--------|---------|-------|-------|-------|----------------------------------------------------|--------------------------|
| 900614 | Spy0331 | -3.3  |       |       | Heat shock protein HtpX                            |                          |
| 900626 | Spy0349 |       |       | -3.5  | Transcription elongation factor GreA               |                          |
| 900643 | Spy0371 |       | -8.5  |       | 23S rRNA methyltransferase                         |                          |
| 900644 | Spy0373 |       |       | -5.3  | Riboflavin transporter                             |                          |
| 900645 | Spy0374 |       |       | -3.4  | Phosphatidylglycerophosphatase B-like protein      |                          |
| 900649 | Spy0379 | -4.7  |       |       | Pyruvate formate-lyase activating protein          |                          |
| 900652 | Spy0383 |       |       | -3.8  | Ferrichrome ABC transporter permease               |                          |
| 900653 | Spy0384 |       |       | -10.9 | Ferrichrome ABC transporter permease               |                          |
| 900667 | Spy0407 |       |       | -3.9  | Hypothetical protein                               |                          |
| 900671 | Spy0414 | -24.3 | -15.9 |       | L-lactate oxidase LctO                             |                          |
| 900672 | Spy0416 | 5.0   |       | -3.9  | C5a family peptidase; chemokine protease ScpC      |                          |
| 900673 | Spy0421 |       | -5.4  |       | Hypothetical membrane protein                      |                          |
| 900675 | Spy0425 |       | -3.9  | -6.2  | Ribonucleotide-diphosphate reductase subunit beta  |                          |
| 900676 | Spy0426 |       | -3.7  | -3.4  | Ribonucleotide reductase stimulatory protein       |                          |
| 900677 | Spy0427 |       | -3.7  | -3.4  | Ribonucleotide-diphosphate reductase subunit alpha |                          |
| 900679 | Spy0430 |       |       | -7.3  | Hypothetical protein                               |                          |
| 900680 | Spy0431 | 7.8   |       |       | Hypothetical protein                               |                          |
| 900682 | Spy0433 |       | -4.2  |       | Hypothetical protein                               |                          |
| 900685 | Spy0437 |       |       | -3.1  | Hypothetical protein                               |                          |
| 900698 | Spy0456 |       | -4.1  |       | ABC transporter permease                           |                          |
| 900701 | Spy0459 |       |       | -4.5  | Hypothetical protein                               |                          |
| 900710 | Spy0470 | -5.3  | -3.2  |       | 67 kDa Myosin-crossreactive streptococcal antigen  |                          |
| 900711 | Spy0471 |       |       | -3.2  | Phosphate starvation-induced protein               |                          |
| 900722 | Spy0486 |       | -9.8  |       | Hypothetical protein                               |                          |
| 900724 | Spy0489 |       | -13.9 | -5.0  | Hypothetical protein                               |                          |
| 900731 | Spy0502 |       |       | -3.1  | Preprotein translocase subunit SecG                |                          |
| 900736 | Spy0507 |       |       | -3.3  | Permease                                           |                          |
| 900737 | Spy0508 |       |       | -3.3  | Permease                                           |                          |
| 900747 | Spy0519 |       |       | -3.7  | -6.8                                               | ABC Transporter permease |
| 900754 | Spy0530 |       |       | -3.5  | Zn-dependent hydrolase VicX                        |                          |
| 900757 | Spy0533 | 3.8   |       |       | Positive transcriptional regulator Rgg3            |                          |
| 900764 | Spy0540 |       |       | -5.8  | Hypothetical protein                               |                          |
| 900765 | Spy0542 |       |       | -3.7  | UDP-glucose 6-dehydrogenase                        |                          |
| 900769 | Spy0546 | 3.6   |       |       | Chromosome segregation ATPase                      |                          |
| 900770 | Spy0547 | 3.6   |       |       | Hypothetical protein                               |                          |

|        |         |      |      |      |                                                              |
|--------|---------|------|------|------|--------------------------------------------------------------|
| 900771 | Spy0549 | 3.6  |      |      | Hypothetical protein                                         |
| 900774 | Spy0553 |      | 3.5  |      | Toxin-antitoxin system, antitoxin component, PHD family      |
| 900787 | Spy0571 |      | -5.4 | -8.8 | Transcription antiterminator LicT                            |
| 900788 | Spy0572 |      |      | -3.4 | PTS system beta-glucoside-specific transporter subunit IIABC |
| 900792 | Spy0578 | -3.1 |      | -3.0 | Hypothetical membrane spanning protein                       |
| 900809 | Spy0600 |      |      | -3.2 | Thiamine transporter                                         |
| 900826 | Spy0627 | -3.7 |      |      | LacI family transcriptional regulator                        |
| 900834 | Spy0637 |      | -3.9 | -3.5 | Possible sugar-phosphate isomerase                           |
| 900835 | Spy0638 |      |      | -3.7 | 2-dehydro-3-deoxygluconokinase                               |
| 900842 | Spy0646 | -3.3 |      |      | Possible sugar-phosphate isomerase                           |
| 900843 | Spy0647 | -7.3 |      | -4.2 | Acetoin dehydrogenase                                        |
| 900853 | Spy0658 |      |      | -3.1 | Cro-like protein (Prophage 370.1)                            |
| 900855 | Spy0660 |      |      | -3.9 | Hypothetical protein (Prophage 370.1)                        |
| 900856 | Spy0661 |      |      | -3.9 | Hypothetical protein (Prophage 370.1)                        |
| 900857 | Spy0663 |      |      | -3.9 | Chromosome separation protein (Prophage 370.1)               |
| 900859 | Spy0665 |      |      | -3.5 | Hypothetical protein (Prophage 370.1)                        |
| 900860 | Spy0666 |      |      | -3.8 | Hypothetical protein (Prophage 370.1)                        |
| 900863 | Spy0670 |      |      | -4.2 | Hypothetical protein (Prophage 370.1)                        |
| 900864 | Spy0671 |      |      | -4.2 | DNA replication protein (Protein 370.1)                      |
| 900877 | Spy0686 |      |      | -4.3 | Hypothetical protein (Prophage 370.1)                        |
| 900878 | Spy0688 |      |      | -3.1 | Major head protein (Prophage 370.1)                          |
| 900890 | Spy0702 |      |      | -3.1 | 65 KD protein associated with hyaluronidase (Prophage 370.1) |
| 900891 | Spy0703 |      |      | -4.0 | Hypothetical protein (Prophage 370.1)                        |
| 900897 | Spy0712 | -3.2 |      |      | Phage mf2 DNase (Prophage 370.1)                             |
| 900909 | Spy0724 |      |      | -3.8 | 50S ribosomal protein L19                                    |
| 900910 | Spy0725 |      | -5.5 | -5.6 | Transposase                                                  |
| 900911 | Spy0726 |      |      | -3.1 | DNA gyrase subunit B                                         |
| 900917 | Spy0733 |      |      | -3.3 | Transposase                                                  |
| 900929 | Spy0747 |      | -3.9 |      | Predicted nuclease                                           |
| 900933 | Spy0754 | -3.2 |      |      | ATP synthase F0F1 subunit C                                  |
| 900955 | Spy0779 |      |      | -6.5 | 30S ribosomal protein S21                                    |
| 900974 | Spy0801 |      |      | 4.0  | Ferredoxin                                                   |
| 900979 | Spy0806 |      |      | -3.2 | 50S ribosomal protein L20                                    |
| 900997 | Spy0830 |      |      | -3.6 | Bifunctional pyrimidine regulatory protein PyrR/uracil       |

|        |         |      |      |       |                                                                       |  |
|--------|---------|------|------|-------|-----------------------------------------------------------------------|--|
|        |         |      |      |       | phosphoribosyltransferase                                             |  |
| 901002 | Spy0836 | -3.2 |      |       | Transporter-like protein                                              |  |
| 901006 | Spy0840 |      |      | -4.1  | 30S ribosomal protein S16                                             |  |
| 901007 | Spy0841 |      |      | -6.1  | RNA binding protein                                                   |  |
| 901017 | Spy0853 |      |      | -5.0  | Transcriptional repressor                                             |  |
| 901018 | Spy0854 |      |      | -5.0  | Fructose-1-phosphate kinase                                           |  |
| 901019 | Spy0855 |      |      | -5.0  | PTS system fructose-specific transporter subunit IIABC                |  |
| 901021 | Spy0857 | -3.9 |      |       | Peptidoglycan hydrolase                                               |  |
| 901023 | Spy0861 |      |      | -4.6  | IgG-degrading protease Mac-1                                          |  |
| 901030 | Spy0872 | -4.5 |      |       | 5'-nucleotidase                                                       |  |
| 901047 | Spy0889 |      |      | -3.2  | Ribose-5-phosphate isomerase A                                        |  |
| 901070 | Spy0916 |      |      | -4.1  | Hypothetical protein                                                  |  |
| 901081 | Spy0928 | -4.3 |      |       | Similar to DNA replication protein                                    |  |
| 901082 | Spy0929 | -4.3 |      |       | Endonuclease III                                                      |  |
| 901085 | Spy0932 | -3.9 |      |       | Oxidoreductase                                                        |  |
| 901092 | Spy0940 |      | -6.5 | -8.6  | Hypothetical protein (prophage 370.2)                                 |  |
| 901095 | Spy0944 |      | -3.9 | -5.3  | Hypothetical protein (prophage 370.2)                                 |  |
| 901096 | Spy0945 |      | -5.0 | -10.0 | Cro/C1-type HTH DNA-binding domain protein repressor (prophage 370.2) |  |
| 901097 | Spy0946 |      | -4.1 | -7.2  | P1-type antirepressor (prophage 370.2)                                |  |
| 901098 | Spy0947 |      | -3.9 |       | Hypothetical protein (prophage 370.2)                                 |  |
| 901099 | Spy0948 |      | -3.2 | -5.1  | Hypothetical protein (prophage 370.2)                                 |  |
| 901100 | Spy0949 |      |      | -5.6  | Hypothetical protein (prophage 370.2)                                 |  |
| 901101 | Spy0951 |      | -3.5 | -8.2  | Excisionase (frameshift mutation) (prophage 370.2)                    |  |
| 901102 | Spy0952 |      |      | -7.1  | Hypothetical protein (prophage 370.2)                                 |  |
| 901103 | Spy0953 |      |      | -5.6  | Hypothetical protein (prophage 370.2)                                 |  |
| 901104 | Spy0954 |      |      | -5.6  | Hypothetical protein (prophage 370.2)                                 |  |
| 901105 | Spy0956 |      | -7.8 | -7.4  | Hypothetical protein (prophage 370.2)                                 |  |
| 901106 | Spy0957 |      |      | -6.2  | Hypothetical protein (prophage 370.2)                                 |  |
| 901107 | Spy0958 | 3.0  | -3.7 | -5.2  | Phage recombination protein Bet (prophage 370.2)                      |  |
| 901108 | Spy0959 |      | -3.9 | -9.5  | Hypothetical protein (prophage 370.2)                                 |  |
| 901109 | Spy0960 | 3.7  | -4.7 | -5.7  | Hypothetical protein (prophage 370.2)                                 |  |
| 901110 | Spy0961 |      |      | -7.7  | Hypothetical protein (prophage 370.2)                                 |  |

|        |         |       |      |       |                                       |                                                                           |
|--------|---------|-------|------|-------|---------------------------------------|---------------------------------------------------------------------------|
|        |         |       |      |       | 370.2)                                |                                                                           |
| 901111 | Spy0962 |       |      | -7.7  | Hypothetical protein (prophage 370.2) |                                                                           |
| 901112 | Spy0963 |       |      | -4.8  | Hypothetical protein (prophage 370.2) |                                                                           |
| 901113 | Spy0965 |       |      | -5.1  | Hypothetical protein (prophage 370.2) |                                                                           |
| 901114 | Spy0967 |       |      | -11.7 | -35.9                                 | ArpU family transcriptional regulator (prophage 370.2)                    |
| 901115 | Spy0968 |       |      | -3.3  | -3.1                                  | Hypothetical protein (prophage 370.2)                                     |
| 901116 | Spy0970 |       |      | -7.8  |                                       | Hypothetical protein (prophage 370.2)                                     |
| 901122 | Spy0977 | 4.3   |      |       |                                       | Hypothetical protein (prophage 370.2)                                     |
| 901124 | Spy0979 |       |      | -10.0 |                                       | Hypothetical protein (prophage 370.2)                                     |
| 901125 | Spy0980 | 4.7   | -8.2 | -7.3  |                                       | Phage associated antirepressor (prophage 370.2)                           |
| 901137 | Spy0994 |       | 12.3 | -4.0  |                                       | Minor tail protein (prophage 370.2)                                       |
| 901138 | Spy0995 |       | 3.1  |       |                                       | Putative phage tail component, N-terminal domain protein (prophage 370.2) |
| 901139 | Spy0996 |       | 3.1  |       |                                       | Phage endopeptidase (prophage 370.2)                                      |
| 901140 | Spy0997 |       | 3.1  |       |                                       | Phage associated hyaluronidase (prophage 370.2)                           |
| 901146 | Spy1007 | -4.6  |      |       |                                       | Exotoxin I (prophage 370.2)                                               |
| 901147 | Spy1008 | -3.1  |      |       |                                       | Exotoxin H (prophage 370.2)                                               |
| 901152 | Spy1016 |       | -3.0 |       |                                       | ABC transporter substrate-binding protein                                 |
| 901153 | Spy1017 |       |      |       | -4.3                                  | Hypothetical protein                                                      |
| 901154 | Spy1018 |       | -5.6 |       |                                       | ABC transport protein permease                                            |
| 901155 | Spy1019 |       | -5.6 |       |                                       | ABC transporter ATP-binding protein                                       |
| 901163 | Spy1031 |       | -3.2 |       |                                       | Dihydrolipoamide dehydrogenase, component E3                              |
| 901185 | Spy1057 | -35.5 |      | -9.0  |                                       | PTS system mannose/fructose family transporter subunit IIA                |
| 901186 | Spy1058 | -21.5 |      | -6.9  |                                       | PTS system mannose/fructose family transporter subunit IIB                |
| 901187 | Spy1059 | -6.8  |      | -1.9* |                                       | PTS system mannose/fructose family transporter subunit IIC                |
| 901188 | Spy1060 | -6.8  |      | -1.9* |                                       | PTS system mannose/fructose family transporter subunit IID                |
| 901193 | Spy1065 |       |      |       | -4.9                                  | Acetyltransferase                                                         |
| 901210 | Spy1085 |       |      |       | -3.1                                  | Lantibiotic associated ABC transporter ATP-binding protein SrtF           |
| 901211 | Spy1086 |       |      |       | -7.6                                  | Lantibiotic associated protein SrtE                                       |
| 901212 | Spy1087 |       | -6.5 |       |                                       | Lantibiotic associated protein SrtG                                       |

|        |         |       |       |       |                                                                  |   |
|--------|---------|-------|-------|-------|------------------------------------------------------------------|---|
| 901217 | Spy1096 |       |       | -3.1  | Folyl-polyglutamate synthetase                                   |   |
| 901230 | Spy1110 | -9.8  |       |       | NAD-dependent malic enzyme MaeE                                  |   |
| 901231 | Spy1111 |       | -5.2  |       | Zinc-containing alcohol dehydrogenase                            |   |
| 901232 | Spy1113 | -3.3  |       |       | Acid phosphatase / phosphotransferase AphA                       |   |
| 901246 | Spy1128 | -4.7  |       |       | Phosphotransacetylase EutD                                       |   |
| 901248 | Spy1131 | -3.1  |       |       | Na <sup>+</sup> driven multidrug efflux pump                     |   |
| 901251 | Spy1135 |       |       | -3.8  | Guanosine 5'-monophosphate oxidoreductase                        |   |
| 901252 | Spy1136 | -15.4 |       | -7.5  | Xanthine phosphoribosyltransferase                               | █ |
| 901253 | Spy1137 | -15.4 |       | -7.5  | Purine permease                                                  | █ |
| 901254 | Spy1138 |       |       | -3.1  | Thiamine biosynthesis lipoprotein                                | █ |
| 901255 | Spy1139 | -3.5  |       | -3.6  | 4-oxalocrotonate tautomerase                                     | █ |
| 901256 | Spy1140 |       |       | -3.3  | Thymidine kinase                                                 |   |
| 901264 | Spy1148 | -3.5  |       |       | ABC transporter ATP-binding protein                              | █ |
| 901265 | Spy1149 | -3.5  |       |       | ABC transporter ATP-binding protein                              | █ |
| 901267 | Spy1151 |       |       | -3.4  | L-lactate dehydrogenase                                          |   |
| 901271 | Spy1156 |       |       | -4.2  | Hypothetical protein                                             | █ |
| 901272 | Spy1157 |       |       | -4.6  | Signal peptide protein                                           | █ |
| 901273 | Spy1158 | -3.0  |       |       | DeoR family transcriptional regulator                            | █ |
| 901274 | Spy1159 | -4.9  | -5.7  |       | Hemolysin HyIII                                                  |   |
| 901275 | Spy1160 | -4.9  | -5.7  |       | Cytoplasmic protein                                              | █ |
| 901278 | Spy1163 |       |       | -15.2 | Smf family DNA processing protein                                |   |
| 901280 | Spy1168 |       |       | -6.2  | Putative transcriptional regulator                               |   |
| 901282 | Spy1170 |       | -5.2  |       | D-lactate dehydrogenase                                          |   |
| 901287 | Spy1175 |       |       | -3.7  | Membrane protein                                                 | █ |
| 901288 | Spy1176 |       |       | -3.7  | Methylmalonyl-CoA decarboxylase, gamma-subunit                   | █ |
| 901292 | Spy1180 |       | -3.6  |       | Mg <sup>2+</sup> /citrate complex transporter                    |   |
| 901293 | Spy1181 | -5.6  | -21.0 |       | Hypothetical protein                                             |   |
| 901294 | Spy1183 | -7.0  | -6.2  |       | Acetyl-CoA carboxylase biotin carboxyl carrier protein subunit   | █ |
| 901295 | Spy1184 |       | -3.3  | -5.5  | Decarboxylase                                                    | █ |
| 901302 | Spy1193 |       |       | -3.0  | Hypothetical protein                                             |   |
| 901303 | Spy1196 |       |       | -7.1  | Site-specific tyrosine recombinase XerC                          |   |
| 901306 | Spy1201 |       |       | -4.0  | DNA-binding protein ylxM                                         |   |
| 901310 | Spy1205 |       |       | -3.1  | UDP-N- acetylmuramoyl-pentapeptide-lysine N(6)-alanyltransferase |   |
| 901316 | Spy1212 | -3.7  |       |       | Cardiolipin synthetase                                           | █ |
| 901317 | Spy1213 | -5.1  |       |       | Formate--tetrahydrofolate ligase                                 |   |
| 901318 | Spy1214 | -3.2  |       |       | Lipoate-protein ligase                                           | █ |
| 901327 | Spy1223 |       |       | -3.2  | Membrane protein                                                 |   |
| 901329 | Spy1225 | -4.9  |       |       | Sugar ABC transporter permease                                   |   |

|        |         |      |      |       |      |                                                              |
|--------|---------|------|------|-------|------|--------------------------------------------------------------|
| 901335 | Spy1233 | -3.6 |      |       |      | Pantothenate kinase                                          |
| 901336 | Spy1234 |      |      |       | -4.6 | 30S ribosomal protein S20                                    |
| 901340 | Spy1240 |      | -3.1 |       |      | Phosphate uptake regulatory protein PhoU                     |
| 901341 | Spy1241 |      | -3.2 |       |      | Phosphate transporter ATP-binding protein PstB               |
| 901342 | Spy1242 |      | -3.5 |       |      | Phosphate transporter ATP-binding protein PstB2              |
| 901355 | Spy1255 |      |      |       | -3.8 | Peptide ABC transporter permease                             |
| 901356 | Spy1257 | -3.0 |      | -3.8  | -4.6 | ABC transporter ATP-binding protein                          |
| 901357 | Spy1258 | -5.6 | 3.7  | 4.8   | -3.1 | TetR/AcrR family transcriptional regulator                   |
| 901358 | SPy1259 |      |      |       | -3.1 | Transcriptional regulator                                    |
| 901364 | Spy1265 | -3.3 |      |       |      | Transglycosylase associated protein                          |
| 901366 | Spy1270 |      | -9.1 |       | -7.4 | Na(+)-linked D-alanine glycine permease                      |
| 901369 | Spy1274 |      | -3.4 |       |      | Amino acid ABC transporter substrate-binding protein         |
| 901370 | Spy1275 |      | -3.5 |       |      | Amino acid ABC transporter ATP-binding protein               |
| 901385 | Spy1292 | -3.7 |      |       |      | 4-alpha-glucanotransferase MalM                              |
| 901386 | Spy1293 | -3.9 |      |       |      | Maltose operon transcriptional repressor MalR                |
| 901391 | Spy1298 |      |      |       | -3.0 | Maltodextrose utilization protein MalA                       |
| 901396 | Spy1306 | -3.5 |      | -4.0  | -3.7 | Maltose/maltodextrin-binding protein MalX                    |
| 901405 | Spy1319 |      |      | -5.9  | -4.4 |                                                              |
| 901410 | Spy1326 |      |      | -3.4  |      | Outer surface protein                                        |
| 901411 | Spy1328 |      | 5.5  |       |      | Beta-glucosidase BglA.2                                      |
| 901413 | Spy1332 |      |      |       | -3.3 | UDP-N-acetylglucosamine 1-carboxyvinyltransferase            |
| 901415 | Spy1335 |      |      | -9.1  |      | Conserved hypothetical protein - transposon IS861 associated |
| 901419 | Spy1339 | -9.0 |      | -38.3 |      | Diaminopimelate epimerase                                    |
| 901432 | Spy1357 | -9.0 |      |       |      | Protein G-like alpha 2M-binding protein (GRAB)               |
| 901441 | Spy1367 |      |      |       | -4.6 | Membrane protein                                             |
| 901442 | Spy1368 |      |      |       | -3.2 | Uridine kinase                                               |
| 901448 | Spy1374 |      |      |       | -3.7 | Glutaredoxin NrdH                                            |
| 901449 | Spy1375 |      |      |       | -3.1 | Ribonucleotide-diphosphate reductase subunit alpha NrdE.2    |
| 901450 | Spy1378 |      | -3.1 |       | -4.6 | Ribonucleotide-diphosphate reductase subunit beta            |
| 901451 | Spy1379 |      | -3.1 |       | -4.6 |                                                              |



|        |         |      |       |      |                                                                            |
|--------|---------|------|-------|------|----------------------------------------------------------------------------|
| 901459 | Spy1392 |      | -27.7 | -7.8 | Oxalate/formate antiporter                                                 |
| 901461 | Spy1395 |      |       | -3.3 | Transcriptional factor                                                     |
| 901463 | Spy1399 |      |       | -3.8 | N-acetylglucosamine-6-phosphate isomerase                                  |
| 901466 | Spy1402 | -3.2 |       |      | Hypothetical protein                                                       |
| 901467 | Spy1404 | -3.2 |       |      | Hypothetical protein                                                       |
| 901468 | Spy1405 | -3.2 |       |      | Hypothetical protein                                                       |
| 901469 | Spy1406 | -3.2 |       |      | Superoxide dismutase (Fe/Mn) SodA                                          |
| 901470 | Spy1407 | -3.3 |       |      | DNA polymerase III subunit delta                                           |
| 901471 | Spy1408 |      | -9.8  |      | Competence protein ComEC                                                   |
| 901472 | Spy1409 |      | -9.8  |      | Competence protein ComEA                                                   |
| 901479 | Spy1419 |      |       | -3.8 | Integral membrane family protein                                           |
| 901482 | Spy1422 |      |       | -3.2 | Recombination protein RecR                                                 |
| 901483 | Spy1423 |      |       | -3.4 | Similar to penicillin binding proteins                                     |
| 901486 | Spy1427 | 3.2  |       |      | Transcriptional regulator                                                  |
| 901489 | Spy1434 |      |       | -3.1 | Heavy metal-transporting ATPase                                            |
| 901491 | Spy1437 |      |       | -3.2 | Membrane protein (prophage 370.3)                                          |
| 901496 | Spy1443 |      | -3.6  | -3.6 | Hypothetical protein (prophage 370.3)                                      |
| 901498 | Spy1445 |      |       | -4.2 | Phage associated hyaluronidase                                             |
| 901499 | Spy1446 |      |       | -4.2 | Phage minor structural protein, N-terminal domain protein (prophage 370.3) |
| 901500 | Spy1447 |      |       | -4.2 | Hypothetical protein (prophage 370.3)                                      |
| 901501 | Spy1448 |      |       | -4.2 | Hypothetical protein (prophage 370.3)                                      |
| 901502 | Spy1449 |      |       | -4.2 | Hypothetical protein (prophage 370.3)                                      |
| 901512 | Spy1460 | 3.1  |       |      | Terminase (prophage 370.3)                                                 |
| 901520 | Spy1469 |      | -4.6  |      | Hypothetical protein (prophage 370.3)                                      |
| 901522 | Spy1471 | 3.6  |       |      | Membrane protein (prophage 370.3)                                          |
| 901530 | Spy1481 |      | -10.3 | -4.0 | Hypothetical protein (prophage 370.3)                                      |
| 901531 | Spy1482 |      | -10.3 | -4.0 | DNA replication protein DnaD (prophage 370.3)                              |
| 901539 | Spy1489 |      |       | -3.1 | Histone-like DNA-binding protein                                           |
| 901545 | Spy1496 | -3.2 |       |      | Repressor protein                                                          |
| 901546 | Spy1497 | -3.2 |       |      | Hemolysin HlyA1                                                            |
| 901547 | Spy1498 | -3.2 |       |      | Geranyltranstransferase                                                    |
| 901548 | Spy1499 | -3.2 |       |      | Exodeoxyribonuclease VII small subunit                                     |
| 901549 | Spy1500 | -3.2 |       |      | Exodeoxyribonuclease VII large subunit                                     |
| 901551 | Spy1503 | -4.0 |       |      | Phosphomannomutase                                                         |
| 901555 | Spy1508 |      |       | -3.5 | Hypothetical cytosolic protein                                             |

|        |         |       |       |       |                                                              |
|--------|---------|-------|-------|-------|--------------------------------------------------------------|
| 901570 | Spy1526 |       |       | -4.1  | Membrane protein                                             |
| 901576 | Spy1532 |       | -3.5  |       | Prepilin peptidase                                           |
| 901579 | Spy1535 |       | -3.6  |       | Ribose transport operon repressor                            |
| 901583 | Spy1539 |       | -3.7  |       | Asparagine synthetase A (aspartate-<br>-ammonia ligase) AsnA |
| 901693 | Spy1543 | -1.8* | 4.1   |       | Arginine/ornithine antiporter ArcD                           |
| 901696 | Spy1544 | -1.7* |       | -3.1  | Ornithine carbamoyltransferase ArcB                          |
| 901712 | Spy1546 | -26.1 |       | -5.0  | Acetyltransferase                                            |
| 901715 | Spy1547 | -10.1 |       | -4.9  | Arginine deiminase ArcA                                      |
| 901748 | Spy1551 | -3.9  |       |       | tRNA synthetase subunit beta                                 |
| 901782 | Spy1558 |       |       | -8.6  | Thiol:disulfide interchange protein<br>TlpA                  |
| 901827 | Spy1580 |       |       | -3.7  | Acetate kinase                                               |
| 901839 | Spy1591 |       |       | -4.8  | ABC transporter substrate-binding<br>protein                 |
| 901841 | Spy1592 |       |       | -4.8  | ABC transporter substrate-binding<br>protein                 |
| 901842 | Spy1593 |       |       | -5.0  | Sugar-binding transport protein                              |
| 901843 | Spy1595 |       |       | -2.8* | Sugar-binding transport protein                              |
| 901844 | Spy1596 |       |       | -7.9  | Transcriptional regulator                                    |
| 901858 | Spy1607 | -4.4  |       | -1.6* | Recombination regulator RecX                                 |
| 901859 | Spy1608 | -1.2* |       | -4.4  | Hypothetical protein                                         |
| 901860 | Spy1610 |       |       | 4.0   | Transposase                                                  |
| 901861 | Spy1613 | -6.8  |       | -4.0  | Sigma 54 modulation protein<br>/Ribosome-associated factor Y |
| 901862 | Spy1615 |       | -4.8  |       | Late competence protein ComFC                                |
| 901863 | Spy1616 |       | -4.8  |       | DNA uptake late competence protein<br>ComFA                  |
| 901866 | Spy1618 |       |       | -4.8  | O-acetylserine lyase                                         |
| 901873 | Spy1623 |       |       | -3.7  | Transporter YvqF                                             |
| 901898 | Spy1644 |       | -4.8  |       | Methyltransferase                                            |
| 901908 | Spy1656 |       | -4.3  |       | Membrane protein                                             |
| 901909 | Spy1657 |       | -2.0* | -3.1  | Amino acid ABC transporter ATP-<br>binding protein           |
| 901910 | Spy1658 |       | -2.0* | -3.1  | Amino acid ABC transporter<br>permease                       |
| 901912 | Spy1662 |       | -3.1  |       | Phospho-N-acetylmuramoyl<br>pentapeptide transferase MraY    |
| 901922 | Spy1675 | -3.2  |       |       | Enterocin A immunity protein                                 |
| 901925 | Spy1678 | -3.3  |       |       | Transaldolase                                                |
| 901926 | Spy1680 | -3.0  |       | -4.8  | Trans-acting positive regulator                              |
| 901927 | Spy1681 | -3.0  |       | -4.8  | NADH peroxidase/NADH oxidase                                 |
| 901928 | Spy1682 |       | -4.5  |       | Glycerol uptake facilitator GlpF                             |
| 901929 | Spy1683 |       |       | -3.4  | Alpha-glycerophosphate oxidase<br>GlpO                       |

|        |         |      |       |      |       |                                                                       |
|--------|---------|------|-------|------|-------|-----------------------------------------------------------------------|
| 901930 | Spy1684 |      |       |      | -3.6  | Glycerol kinase                                                       |
| 901946 | Spy1707 |      |       |      | -4.3  | Galactose-6-phosphate isomerase subunit LacB                          |
| 901947 | Spy1708 |      |       |      | -4.0  | Galactose-6-phosphate isomerase subunit LacA                          |
| 901948 | Spy1709 |      |       | -3.2 |       | PTS system galactose-specific transporter subunit IIC                 |
| 901949 | Spy1710 | -4.1 |       |      |       | PTS system galactose-specific transporter subunit IIB                 |
| 901950 | Spy1711 | -4.1 |       |      |       | PTS system galactose-specific transporter subunit IIA                 |
| 901952 | Spy1714 |      |       |      | -3.5  | Copper chaperone                                                      |
| 901961 | Spy1725 |      |       |      | -4.0  | Ribosome maturation protein RimP                                      |
| 901964 | Spy1728 |      | -3.2  |      |       | ABC transporter permease                                              |
| 901968 | Spy1733 |      | -5.0  |      |       | Transcriptional regulator                                             |
| 901969 | Spy1734 |      | -3.7  |      |       | Acetyltransferase                                                     |
| 901970 | Spy1735 |      | -3.7  |      |       | ATP/GTP hydrolase                                                     |
| 901971 | Spy1736 |      | -32.9 |      | -11.1 | Guanine-hypoxanthine permease PbuG                                    |
| 901975 | Spy1740 |      |       |      | -3.2  | PTS system mannose-specific transporter subunit IID                   |
| 901977 | Spy1742 | -3.4 |       |      |       | Seryl tRNA synthetase SerS                                            |
| 901978 | Spy1743 | -3.8 | -3.9  | -3.0 | -3.5  | Acetyl-coenzyme A carboxylase carboxyl transferase subunit alpha AccA |
| 901979 | Spy1744 | -3.8 | -3.9  | -3.0 | -3.5  | Acetyl-coenzyme A carboxylase carboxyl transferase subunit beta AccD  |
| 901980 | Spy1745 | -3.6 | -4.3  | -3.0 |       | Biotin carboxylase (A subunit of acetyl-CoA carboxylase) AccC         |
| 901981 | Spy1746 | -3.2 | -3.8  | -3.3 | -4.2  | (3R)-hydroxymyristoyl-(acyl carrier protein) dehydratase FabZ         |
| 901982 | Spy1747 | -3.2 | -3.8  | -3.3 | -4.2  | biotin carboxyl carrier protein of acetyl-CoA carboxylase AccB        |
| 901983 | Spy1748 |      | -4.1  |      |       | 3-oxoacyl-ACP synthase FabF                                           |
| 901984 | Spy1749 |      | -4.0  |      |       | 3-ketoacyl-ACP reductase FabG                                         |
| 901986 | Spy1750 |      | -4.0  |      |       | Malonyl CoA-ACYL carrier protein transacylase FabD                    |
| 901987 | Spy1751 |      | -4.7  |      |       | Trans-2-enoyl-ACP reductase II FabK                                   |
| 901988 | Spy1753 |      |       |      | -3.2  | Acyl carrier protein AcpP                                             |
| 901989 | Spy1754 |      | -3.4  |      |       | 3-oxoacyl-ACP synthase FabH                                           |
| 901990 | Spy1755 |      | -3.0  |      |       | MarR family transcriptional regulator                                 |
| 901992 | Spy1759 |      |       |      | -3.4  | Molecular chaperone DnaJ                                              |
| 902008 | Spy1776 |      | 10.7  |      | -3.9  | Pyrazinamidase/nicotinamidase                                         |
| 902011 | Spy1780 | -3.2 |       |      |       | Universal stress protein UspA                                         |

|        |         |       |     |      |      |                                           |                                                           |
|--------|---------|-------|-----|------|------|-------------------------------------------|-----------------------------------------------------------|
| 902016 | Spy1785 |       |     | -3.6 |      | ATP-dependent DNA helicase RecG           |                                                           |
| 902028 | Spy1802 |       |     | -3.3 | -3.4 | Alanine racemase                          |                                                           |
| 902029 | Spy1804 |       |     | -3.3 | -3.4 | Holo-[acyl-carrier protein] synthase AcpS |                                                           |
| 902034 | Spy1811 |       |     |      | -3.5 | -5.0                                      | Fructokinase                                              |
| 902035 | Spy1813 |       |     |      | -3.9 | -4.0                                      | Endo-beta-N-acetylglucosaminidase F2                      |
| 902036 | Spy1815 |       |     |      | -3.7 | -5.1                                      | PTS system sucrose-specific transporter subunit IIABC     |
| 902047 | Spy1829 |       |     |      |      | -3.7                                      | 30S ribosomal protein S18                                 |
| 902050 | Spy1832 |       |     |      |      | -6.6                                      | Hypothetical protein                                      |
| 902057 | Spy1840 |       |     |      |      | -3.8                                      | Seryl-tRNA synthetase                                     |
| 902066 | Spy1852 |       |     | -5.2 |      |                                           | Sulfite exporter TauE/SafE domain protein                 |
| 902067 | Spy1854 |       |     |      |      | -3.7                                      | Glycerol uptake facilitator protein                       |
| 902068 | Spy1856 | -18.5 | 3.1 |      | -6.8 |                                           | Multidrug resistance protein NorA homolog                 |
| 902070 | Spy1858 |       |     | -3.2 |      |                                           | XAA-Pro dipeptidyl-peptidase PepXP                        |
| 902078 | Spy1868 |       |     |      |      | -3.0                                      | Nucleoside transporter                                    |
| 902079 | Spy1869 |       |     | -3.4 |      |                                           | Uridine phosphorylase                                     |
| 902085 | Spy1875 |       |     | -3.5 |      | -3.6                                      | Hypersensitive-induced response proteins                  |
| 902086 | Spy1876 |       |     | -3.4 |      | -2.3*                                     | Zn-dependent hydrolase                                    |
| 902092 | Spy1884 |       |     |      |      | -3.0                                      | Hypersensitive-induced response proteins                  |
| 902095 | Spy1888 |       |     |      |      | -5.2                                      | 50S ribosomal protein L28                                 |
| 901595 | Spy1911 |       |     |      |      | -3.3                                      | ABC transporter permease SalY                             |
| 901596 | Spy1912 |       |     |      |      | -3.3                                      | ABC transporter ATP-binding protein SalX                  |
| 901597 | Spy1913 |       |     |      |      | -3.3                                      | ABC transporter, ATP-binding protein                      |
| 901599 | Spy1915 |       |     |      |      | -6.6                                      | Lantibiotic Sala                                          |
| 901600 | Spy1916 |       |     |      |      | -4.7                                      | 6-phospho-beta-galactosidase LacG                         |
| 901604 | Spy1921 |       |     |      |      | -6.0                                      | Tagatose-6-phosphate kinase LacC.2                        |
| 901606 | Spy1922 |       |     |      |      | -3.0                                      | Galactose-6-phosphate isomerase subunit LacB              |
| 901607 | Spy1923 | -3.3  |     |      |      | -5.4                                      | LacA subunit                                              |
| 901622 | Spy1942 |       |     | -4.4 |      | -5.1                                      | Hypothetical protein                                      |
| 901627 | Spy1949 |       |     |      |      | -4.3                                      | PTS system ascorbate-specific transporter subunit IIC     |
| 901628 | Spy1950 |       |     |      |      | -3.9                                      | PTS system transporter subunit IIB                        |
| 901629 | Spy1952 |       |     |      |      | -3.9                                      | PTS fructose transporter subunit IIA                      |
| 901643 | Spy1971 | -3.8  |     |      |      |                                           | Bacteriocin transporter                                   |
| 901646 | Spy1976 | -3.1  |     |      |      |                                           | Multiple sugar-binding transport ATP-binding protein MsmK |
| 901651 | Spy1983 | 4.9   |     |      |      |                                           | Collagen-like surface protein SclA                        |
| 901653 | Spy1985 |       |     |      |      | -3.2                                      | Exodeoxyribonuclease III                                  |

|        |         |       |      |       |       |                                                           |
|--------|---------|-------|------|-------|-------|-----------------------------------------------------------|
| 901657 | Spy1989 |       |      |       | -3.1  | Hypothetical protein                                      |
| 901661 | Spy1994 |       |      |       | -3.3  | Repressor protein Pai1                                    |
| 901677 | Spy2018 | 11.1  | 11.4 | 12.2  | 5.0   | M-protein serotype 1 ( <i>emm1</i> )                      |
| 901689 | Spy2038 |       | -3.3 |       | 57.6  | Spi SpeB protease inhibitor                               |
| 901690 | Spy2039 |       |      |       | 143.9 | Pyrogenic exotoxin B                                      |
| 901691 | Spy2040 |       |      |       | 135.9 | Hypothetical protein                                      |
| 901692 | Spy2041 | -5.6  |      |       | 16.6  | Hypothetical protein                                      |
| 901694 | Spy2042 | -3.6  |      |       |       | Transcription regulator RopB/Rgg1                         |
| 901700 | Spy2049 |       |      | -3.1  |       | Pyruvate formate-lyase 2                                  |
| 901701 | Spy2050 |       |      | -5.0  |       | PTS system cellobiose-specific transporter subunit IIC    |
| 901706 | Spy2055 |       |      | -3.2  |       | Pyruvate formate-lyase activating protein                 |
| 901709 | Spy2060 | -3.5  |      |       |       | Endoribonuclease L-PSP                                    |
| 901719 | Spy2077 |       |      |       | -5.5  | Cold shock protein                                        |
| 901720 | Spy2079 | -3.4  |      |       |       | Alkyl hydroperoxidase AhpC                                |
| 901722 | Spy2081 |       | 4.7  |       |       | Imidazolone-5-propionate hydrolase HutI                   |
| 901723 | Spy2082 |       |      | -22.8 | -4.4  | Urocanate hydratase HutU                                  |
| 901724 | Spy2083 | 4.3   |      | -11.8 |       | Glutamate formiminotransferase                            |
| 901725 | Spy2084 |       |      | -10.9 |       | Formiminotetrahydrofolate cyclodeaminase                  |
| 901726 | Spy2085 | -3.2  | -4.9 |       |       | Formate-tetrahydrofolate ligase Fhs.2                     |
| 901728 | Spy2088 |       |      | -7.7  | -6.6  | Cationic amino acid transporter protein                   |
| 901729 | Spy2089 | -3.7  |      | -12.5 |       | Histidine ammonia-lyase HutH                              |
| 901731 | Spy2091 |       |      |       | -3.3  | Regulatory protein                                        |
| 901734 | Spy2093 |       |      |       | -3.0  | Elongation factor Tsf                                     |
| 901736 | Spy2096 |       | -3.8 |       |       | Trehalose-6-phosphate hydrolase                           |
| 901737 | Spy2097 | -3.4  |      | -7.2  |       | PTS system transporter subunit II                         |
| 901739 | Spy2102 |       | -5.7 |       | -3.0  | MarR family transcriptional regulator                     |
| 901740 | Spy2103 | -4.5  |      |       | -3.4  | Glyoxalase                                                |
| 901742 | Spy2105 |       | -9.0 |       | -3.0  | Anaerobic ribonucleotide reductase activator protein NrdG |
| 901743 | Spy2106 |       | -9.0 |       | -3.4  | GNAT family acetyltransferase                             |
| 901745 | Spy2107 |       | -8.7 |       | -3.5  | Oxidoreductase                                            |
| 901746 | Spy2110 |       |      |       | -3.2  | Anaerobic ribonucleoside triphosphate reductase           |
| 901757 | Spy2118 |       | -3.7 |       | -3.5  | DNA-3-methyladenine glycosidase I Tag                     |
| 901758 | Spy2119 |       | -4.3 |       | -1.5* | Holiday junction DNA helicase RuvA                        |
| 901759 | Spy2120 |       | -5.6 |       | -4.2  | Major facilitator family protein LmrP                     |
| 901760 | Spy2121 |       | -3.1 |       | -2.6* | DNA mismatch repair protein MutL                          |
| 901762 | Spy2122 | 107.9 | 40.7 | 75.8  | 111.9 | SpyCIM1 integrase                                         |

|        |         |      |      |       |       |                                              |
|--------|---------|------|------|-------|-------|----------------------------------------------|
| 901763 | Spy2125 | 68.2 | 81.5 | 87.8  | 95.3  | SpyCIM1 repressor protein cl                 |
| 901764 | Spy2126 |      | 12.2 | 16.5  | 48.4  | SpyCIM1 antirepressor protein                |
| 901765 | Spy2127 | 39.8 | 34.1 | 28.6  | 56.0  | SpyCIM1 protein                              |
| 901766 | Spy2128 | 32.7 | 34.1 | 31.8  | 65.0  | SpyCIM1 protein                              |
| 901768 | Spy2129 | 32.7 | 34.1 | 31.8  | 65.0  | SpyCIM1 protein                              |
| 901769 | Spy2130 | 14.2 |      | 23.1  | 31.8  | SpyCIM1 protein                              |
| 901770 | Spy2131 | 14.2 |      | 23.1  | 31.8  | SpyCIM1 protein                              |
| 901771 | Spy2132 |      |      | 11.0  | 28.7  | SpyCIM1 protein                              |
| 901772 | Spy2133 |      |      |       | 24.2  | SpyCIM1 protein                              |
| 901773 | Spy2134 |      |      | 16.5  | 30.3  | SpyCIM1 protein                              |
| 901774 | Spy2135 | 83.8 | 41.7 | 106.5 | 216.3 | SpyCIM1 replication protein                  |
| 901775 | Spy2136 | 83.8 | 41.7 | 106.5 | 216.3 | SpyCIM1 DNA primase                          |
| 901776 | Spy2140 |      | 49.9 | 19.8  | 49.9  | SpyCIM1 protein                              |
| 901777 | Spy2142 |      | 19.7 |       | 19.7  | SpyCIM1 protein                              |
| 901778 | Spy2144 | 18.5 | 15.9 | 11.0  | 21.2  | SpyCIM1 protein                              |
| 901779 | Spy2145 | 18.5 | 15.9 | 11.0  | 21.2  | SpyCIM1 HTH motif protein                    |
| 901780 | Spy2147 | 59.6 | 57.6 | 85.6  | 86.2  | SpyCIM1 protein                              |
| 901787 | Spy2153 |      | -3.4 |       |       | Membrane protein                             |
| 901797 | Spy2164 |      | -4.4 |       |       | Hypothetical protein                         |
| 901805 | Spy2176 | -4.4 | -3.3 | -5.3  | -6.5  | YhgE/Pip domain-containing protein           |
| 901806 | Spy2177 |      |      |       | -3.1  | TetR/AcrR family transcriptional regulator   |
| 901831 | Spy2185 |      | -4.4 |       | -4.3  | Glucose inhibited division protein A<br>GidA |
| 901835 | Spy2186 |      | -3.4 |       | -1.7* | MutT/nudix family protein                    |
| 901848 | Spy2190 |      |      |       | -3.2  | L-serine dehydratase subunit alpha           |
| 901851 | Spy2191 |      | -4.9 |       | -5.1  | Transglycosylase                             |
| 901875 | Spy2200 | 4.6  |      | 2.3*  | -10.6 | Capsule biosynthesis HasA                    |
| 901876 | Spy2201 | 6.2  |      | 4.9   | -2.8* | Capsule biosynthesis HasB                    |
| 901878 | Spy2202 | 6.0  |      | 2.7*  | -3.2  | Capsule biosynthesis HasC                    |
| 901894 | Spy2205 |      | -3.3 |       |       | Glucose uptake family protein                |
| 901899 | Spy2207 |      | -3.5 |       | -3.1  | Tryptophanyl-tRNA synthetase                 |
| 901985 | Spy2214 |      | -4.3 |       |       | Transposase domain                           |

<sup>1</sup> GenBank identifier

<sup>2</sup> Gene locus tag based upon the SF370 annotated genome

<sup>3</sup> Ratio EL – SF370SmR/CEM1Δ4 when  $A_{600\text{ nm}} = 0.2$ ; Ratio LL - SF370SmR/CEM1Δ4 when  $A_{600\text{ nm}} = 0.5$

<sup>4</sup> Not detected

\* Included as part of polycistronic mRNA even though less than 3-fold difference between SF370SmR and CEM1Δ4
