# Supplementary material for: Elimination of Chromosomal Island SpyCIM1 from Streptococcus pyogenes Strain SF370 Reverses the Mutator Phenotype and Alters Global Transcription
Source: PubMed Central journal article supplement (PMC4689407; doi:10.1371/journal.pone.0145884), 2015-12-23
Supplement: pone.0145884.s007.pdf [file pone.0145884.s007.pdf]

**S3 Table.**

| KEGG Pathway                                 | No. of genes | Down | Up | Gene Set | z-score (Down) | z-score (Up) |
|----------------------------------------------|--------------|------|----|----------|----------------|--------------|
| Metabolic pathways                           | 33           | 29   | 4  | 288      | 3.6            | 1.07         |
| Microbial metabolism in diverse environments | 14           | 13   | 1  | 70       | 4.5            | 0.45         |
| Phosphotransferase system (PTS)              | 8            | 8    | 0  | 33       | 4.38           | -0.57        |
| Amino sugar and nucleotide sugar metabolism  | 7            | 5    | 2  | 28       | 2.59           | 3.48         |
| Propanoate metabolism                        | 6            | 5    | 1  | 15       | 4.38           | 2.33         |
| Fatty acid biosynthesis                      | 5            | 5    | 0  | 11       | 5.41           | -0.33        |
| Fructose and mannose metabolism              | 5            | 5    | 0  | 15       | 4.38           | -0.38        |
| Pyruvate metabolism                          | 5            | 5    | 0  | 23       | 3.12           | -0.48        |
| Starch and sucrose metabolism                | 4            | 2    | 2  | 15       | 1.14           | 5.03         |
| Aminobenzoate degradation                    | 3            | 2    | 1  | 10       | 1.81           | 2.99         |
| Ascorbate and aldarate metabolism            | 3            | 2    | 1  | 9        | 1.99           | 3.18         |
| Mismatch repair                              | 3            | 3    | 0  | 16       | 2.09           | -0.39        |
| Benzoate degradation                         | 2            | 2    | 0  | 6        | 2.75           | -0.24        |
| Biotin metabolism                            | 2            | 2    | 0  | 6        | 2.75           | -0.24        |
| Histidine metabolism                         | 2            | 1    | 1  | 6        | 1.06           | 4.01         |
| One carbon pool by folate                    | 2            | 1    | 1  | 10       | 0.49           | 2.99         |
| Pentose and glucuronate interconversions     | 2            | 0    | 2  | 10       | -0.82          | 6.29         |
| Tyrosine metabolism                          | 2            | 2    | 0  | 7        | 2.45           | -0.26        |
| Butanoate metabolism                         | 1            | 0    | 1  | 13       | -0.94          | 2.55         |
| Chloroalkane and chloroalkene degradation    | 1            | 1    | 0  | 2        | 2.56           | -0.14        |
| Naphthalene degradation                      | 1            | 1    | 0  | 2        | 2.56           | -0.14        |
| Riboflavin metabolism                        | 1            | 1    | 0  | 2        | 2.56           | -0.14        |
| Taurine and hypotaurine metabolism           | 1            | 1    | 0  | 2        | 2.56           | -0.14        |
