# Supplementary material for: Elimination of Chromosomal Island SpyCIM1 from Streptococcus pyogenes Strain SF370 Reverses the Mutator Phenotype and Alters Global Transcription
Source: PubMed Central journal article supplement (PMC4689407; doi:10.1371/journal.pone.0145884), 2015-12-23
Supplement: pone.0145884.s008.pdf [file pone.0145884.s008.pdf]

**S4 Table.**

| <b>KEGG Pathway</b>                          | <b>No. of genes</b> | <b>Down</b> | <b>Up</b> | <b>Gene Set</b> | <b>z-score (Down)</b> | <b>z-score (Up)</b> |
|----------------------------------------------|---------------------|-------------|-----------|-----------------|-----------------------|---------------------|
| Metabolic pathways                           | 20                  | 18          | 2         | 288             | 2.53                  | -2.17               |
| Aminoacyl-tRNA biosynthesis                  | 11                  | 0           | 11        | 86              | -2.05                 | 7.59                |
| Microbial metabolism in diverse environments | 7                   | 7           | 0         | 70              | 2.66                  | -1.28               |
| Phosphotransferase system (PTS)              | 6                   | 6           | 0         | 33              | 4.21                  | -0.85               |
| Propanoate metabolism                        | 6                   | 6           | 0         | 15              | 7.12                  | -0.56               |
| Pyruvate metabolism                          | 5                   | 5           | 0         | 23              | 4.37                  | -0.7                |
| Fatty acid biosynthesis                      | 4                   | 4           | 0         | 11              | 5.46                  | -0.48               |
| Starch and sucrose metabolism                | 4                   | 3           | 1         | 15              | 3.16                  | 1.28                |
| Aminobenzoate degradation                    | 3                   | 3           | 0         | 10              | 4.18                  | -0.46               |
| Butanoate metabolism                         | 3                   | 3           | 0         | 13              | 3.5                   | -0.52               |
| Fructose and mannose metabolism              | 3                   | 3           | 0         | 15              | 3.16                  | -0.56               |
| Histidine metabolism                         | 3                   | 3           | 0         | 6               | 5.72                  | -0.35               |
| Arginine and proline metabolism              | 2                   | 2           | 0         | 11              | 2.39                  | -0.48               |
| One carbon pool by folate                    | 2                   | 2           | 0         | 10              | 2.57                  | -0.46               |
| Tyrosine metabolism                          | 2                   | 2           | 0         | 7               | 3.3                   | -0.38               |
| Chloroalkane and chloroalkene degradation    | 1                   | 1           | 0         | 2               | 3.29                  | -0.2                |
| Fatty acid metabolism                        | 1                   | 1           | 0         | 4               | 2.12                  | -0.29               |
| Naphthalene degradation                      | 1                   | 1           | 0         | 2               | 3.29                  | -0.2                |
