# Supplementary material for: Elimination of Chromosomal Island SpyCIM1 from Streptococcus pyogenes Strain SF370 Reverses the Mutator Phenotype and Alters Global Transcription
Source: PubMed Central journal article supplement (PMC4689407; doi:10.1371/journal.pone.0145884), 2015-12-23
Supplement: pone.0145884.s009.pdf [file pone.0145884.s009.pdf]

**S5 Table.**

| <b>KEGG Pathway</b>             | <b>No. of genes</b> | <b>Down</b> | <b>Up</b> | <b>Gene Set</b> | <b>z-score (Down)</b> | <b>z-score (Up)</b> |
|---------------------------------|---------------------|-------------|-----------|-----------------|-----------------------|---------------------|
| Aminoacyl-tRNA biosynthesis     | 34                  | 34          | 0         | 86              | 7.61                  | -0.68               |
| Purine metabolism               | 14                  | 14          | 0         | 49              | 3.22                  | -0.5                |
| Fatty acid biosynthesis         | 10                  | 10          | 0         | 11              | 7.59                  | -0.23               |
| Propanoate metabolism           | 5                   | 4           | 1         | 15              | 1.52                  | 3.55                |
| Ribosome                        | 4                   | 4           | 0         | 71              | -2.05                 | -0.61               |
| Biotin metabolism               | 3                   | 3           | 0         | 6               | 2.63                  | -0.17               |
| Glycolysis /<br>Gluconeogenesis | 2                   | 1           | 1         | 24              | -1.36                 | 2.7                 |
| Aminobenzoate<br>degradation    | 1                   | 0           | 1         | 10              | -1.26                 | 4.44                |
| Butanoate metabolism            | 1                   | 0           | 1         | 13              | -1.44                 | 3.85                |
| Histidine metabolism            | 1                   | 0           | 1         | 6               | -0.97                 | 5.83                |
| Two-component system            | 1                   | 0           | 1         | 30              | -2.21                 | 2.35                |
