# Supplementary material for: Elimination of Chromosomal Island SpyCIM1 from Streptococcus pyogenes Strain SF370 Reverses the Mutator Phenotype and Alters Global Transcription
Source: PubMed Central journal article supplement (PMC4689407; doi:10.1371/journal.pone.0145884), 2015-12-23
Supplement: pone.0145884.s010.pdf [file pone.0145884.s010.pdf]

**S6 Table.**

| <b>KEGG Pathway</b>               | <b>No. of genes</b> | <b>Down</b> | <b>Up</b> | <b>Gene Set</b> | <b>z-score (Down)</b> | <b>z-score (Up)</b> |
|-----------------------------------|---------------------|-------------|-----------|-----------------|-----------------------|---------------------|
| Ribosome                          | 17                  | 17          | 0         | 71              | 2.18                  | -0.5                |
| Purine metabolism                 | 16                  | 16          | 0         | 49              | 3.54                  | -0.41               |
| Aminoacyl-tRNA biosynthesis       | 12                  | 10          | 2         | 86              | -0.99                 | 3.59                |
| Ascorbate and aldarate metabolism | 5                   | 5           | 0         | 9               | 3.4                   | -0.17               |
