# Supplementary material for: Elimination of Chromosomal Island SpyCIM1 from Streptococcus pyogenes Strain SF370 Reverses the Mutator Phenotype and Alters Global Transcription
Source: PubMed Central journal article supplement (PMC4689407; doi:10.1371/journal.pone.0145884), 2015-12-23
Supplement: pone.0145884.s011.pdf [file pone.0145884.s011.pdf]

**S7 Table.**

|                        | Gene        | qRT-PCR fold change<br>(SF370SmR/CEM1Δ4) | RNA-seq fold change<br>(SF370SmR/CEM1Δ4)* |
|------------------------|-------------|------------------------------------------|-------------------------------------------|
| <b>37 °C Early Log</b> | <i>nga</i>  | 2.0                                      | 2.6                                       |
|                        | <i>slo</i>  | 4.5                                      | 3                                         |
|                        | <i>norA</i> | -14.3                                    | -18.5                                     |
|                        | <i>emm</i>  | 11.9                                     | 11.1                                      |
|                        | <i>speB</i> | **                                       | **                                        |
|                        | <i>hasB</i> | 2.1                                      | 6.2                                       |
| <b>37 °C Late Log</b>  | <i>nga</i>  | -1.9                                     | 1.5                                       |
|                        | <i>slo</i>  | -2.7                                     | 1.2                                       |
|                        | <i>norA</i> | 3.5                                      | 3.1                                       |
|                        | <i>emm</i>  | 36.3                                     | 11.4                                      |
|                        | <i>speB</i> | 1.0                                      | 1                                         |
|                        | <i>hasB</i> | -1.6                                     | 1                                         |
| <b>39 °C Early Log</b> | <i>nga</i>  | 3.1                                      | 2.3                                       |
|                        | <i>slo</i>  | 7.9                                      | 3.6                                       |
|                        | <i>norA</i> | -3.8                                     | -6.8                                      |
|                        | <i>emm</i>  | 27                                       | 12.2                                      |
|                        | <i>speB</i> | **                                       | **                                        |
|                        | <i>hasB</i> | 1.7                                      | 4.9                                       |
| <b>39 °C Late Log</b>  | <i>nga</i>  | 1.9                                      | 1.4                                       |
|                        | <i>slo</i>  | 1.0                                      | 1.3                                       |
|                        | <i>norA</i> | -1.6                                     | -2.8                                      |
|                        | <i>emm</i>  | 79                                       | 5                                         |
|                        | <i>speB</i> | 251                                      | 143.9                                     |
|                        | <i>hasB</i> | -4.4                                     | -2.8                                      |

\* Values calculated by Gene Sifter as described in Methods. The identical cDNA preparations were used for qRT-PCR analysis and RNA-seq analysis

\*\* Not expressed in EL
