# Supplementary material for: Elimination of Chromosomal Island SpyCIM1 from Streptococcus pyogenes Strain SF370 Reverses the Mutator Phenotype and Alters Global Transcription
Source: PubMed Central journal article supplement (PMC4689407; doi:10.1371/journal.pone.0145884), 2015-12-23
Supplement: pone.0145884.s012.pdf [file pone.0145884.s012.pdf]

**S8 Table.**

| <b>Gene</b> | <b>EL</b>   | <b>LL</b>   | <b>Stationary</b> |
|-------------|-------------|-------------|-------------------|
| <i>nga</i>  | 2.7 ± 1.1*  | 1.3 ± 2.4   | 2.3 ± 1.6         |
| <i>slo</i>  | 2.6 ± 0.7   | 1.3 ± 1.9   | 1.6 ± 0.2         |
| <i>norA</i> | -31.1 ± 8.3 | -0.6 ± 1.6  | -2.7 ± 0.4        |
| <i>emm</i>  | 11.4 ± 5.9  | 22.5 ± 7.5  | 5.0 ± 3.4         |
| <i>speB</i> | **          | 18.3 ± 11.9 | -2.2 ± 0.4        |
| <i>hasB</i> | 2.7 ± 1.1   | 0.4 ± 1.1   | -2.2 ± 2.9        |

EL – Early logarithmic growth; A<sub>600</sub> = 0.2 nm

LL – Late logarithmic growth; A<sub>600</sub> = 0.5 nm

Stationary – One hour after LL sample

\* qRT-PCR fold change (SF370SmR/CEM1Δ4)

\*\* Not expressed in EL [46-48]
